# Supplementary material for: Cortical cytasters: a highly conserved developmental trait of Bilateria with similarities to Ctenophora
Source: Springer Nature journal article supplement (doi:10.1186/2041-9139-2-23), 2011-01-01
Supplement: Additional file 1 [file 2041-9139-2-23-s1.pdf]

|                |               | Cortical asters (Cytasters) in egg                          | Centrioles were observed by MET | Cytasters are associated to cytoplasmic components | Origin of cytasters associated to fragments of nuclear vesicle | Not derived from centrosome | Cortical cytoplasmic components are reorganized | Capacity to become a centrosome              | Technique                                                 | Reference                                                         |          |
|----------------|---------------|-------------------------------------------------------------|---------------------------------|----------------------------------------------------|----------------------------------------------------------------|-----------------------------|-------------------------------------------------|----------------------------------------------|-----------------------------------------------------------|-------------------------------------------------------------------|----------|
| A) Protostomes | Hexapoda      | Insects, Collembola                                         | Present                         | Present                                            | Present                                                        | Present                     | Present                                         | Present (in natural parthenogenesis)         | Immunofluorescence and MET                                | 17, 24, 25, 53, 54.                                               |          |
|                | Vericrustacea | <i>Artemia Salina</i>                                       | Present                         | Data Not Available                                 | Data Not Available                                             | Data Not Available          | Present                                         | Present                                      | Present (in natural parthenogenesis)                      | Light microscopy observations of fixed embryos and oocytes        | 5        |
|                | Nematoda      | <i>Caenorhabditis elegans</i>                               | Present                         | Data Not Available                                 | Data Not Available                                             | Data Not Available          | Present                                         | Data Not Available, but suggested by authors | Data Not Available                                        | Immunofluorescence in taxol-treated embryos                       | 55       |
|                | Annelida      | Leech                                                       | Present                         | Data Not Available                                 | Present                                                        | Data Not Available          | Present                                         | Present                                      | Data Not Available                                        | Immunofluorescence in live and fixed oocytes                      | 1, 6, 20 |
|                | Mollusca      | <i>Spisula solidissima</i>                                  | Present                         | Data Not Available                                 | Present                                                        | Data Not Available          | Present                                         | Unclear                                      | Data Not Available                                        | Light microscopy observations in taxol-treated oocytes            | 50       |
|                |               | <i>Crepidula plana</i>                                      | Present                         | Data Not Available, but are inferred.              | Present                                                        | Present                     | Present                                         | Present                                      | Present, in mitosis without cellular divisions (amitosis) | Light microscopy observations in normal and hypertonic conditions | 49       |
|                | Kryptochozoa  | <i>Cerebratulus lacteus</i>                                 | Present                         | Data Not Available                                 | Data Not Available                                             | Present                     | Present                                         | Data Not Available                           | Data Not Available                                        | Light microscopy observations of whole eggs and eggs fragments    | 52       |
|                | Platyzoa      | <i>Baerietta diana</i> ,<br><i>Distoichometra kozloffii</i> | Present                         | Data Not Available                                 | Data Not Available                                             | Data Not Available          | Present                                         | Data Not Available                           | Data Not Available                                        | Light microscopy observations in fixed and stained eggs           | 51       |

|                  |               | Cortical asters (Cytasters) in egg | Centrioles were observed by MET                            | Cytasters are associated to cytoplasmic components | Origin of cytasters associated to fragments of nuclear vesicle | Not derived from centrosome                                 | Cortical cytoplasmic components are reorganized | Capacity to become a centrosome         | Technique                                                                                                                                    | Reference                                                                                                                                                                            |                                 |
|------------------|---------------|------------------------------------|------------------------------------------------------------|----------------------------------------------------|----------------------------------------------------------------|-------------------------------------------------------------|-------------------------------------------------|-----------------------------------------|----------------------------------------------------------------------------------------------------------------------------------------------|--------------------------------------------------------------------------------------------------------------------------------------------------------------------------------------|---------------------------------|
| B) Deuterostomes | Echinodermata | Sea-urchin                         | Present                                                    | Present                                            | Present                                                        | Present                                                     | Present                                         | Present (in artificial parthenogenesis) | Immunofluorescence, light microscopy, and MET in normal, hypertonic and low temperature conditions, and treatment of eggs with several drugs | 15, 18, 21, 37, 16, 58, 59.                                                                                                                                                          |                                 |
|                  |               | Sand-dollar                        | Present                                                    | Present                                            | Data Not Available                                             | Present                                                     | Present                                         | Present                                 | Present (in artificial parthenogenesis)                                                                                                      | Detailed embryological descriptions using light microscopy of the oocyte and embryo under normal, hypertonic and low temperature conditions and treatment of eggs with several drugs | 35, 60                          |
|                  |               | Starfish                           | Present                                                    | Data Not Available, but suggested for authors      | Data Not Available                                             | Present                                                     | Present                                         | Data Not Available                      | Data Not Available                                                                                                                           | Immunofluorescence                                                                                                                                                                   | 39                              |
|                  |               | Sea cucumber                       | Present                                                    | Present                                            | Present                                                        | Present                                                     | Unclear                                         | Unclear                                 | Data Not Available                                                                                                                           | Light microscopy, MET, and treatment of eggs with several drugs                                                                                                                      | 38                              |
|                  | Amphibians    | <i>Cynops</i>                      | Present                                                    | Data Not Available                                 | Data Not Available                                             | Data Not Available                                          | Present                                         | Unclear                                 | Data Not Available                                                                                                                           | Immunofluorescence, Immunohistochemistry, light microscopy and treatment of eggs with several drugs                                                                                  | 48                              |
|                  |               | <i>Triturus viridescens</i>        | Present                                                    | Data Not Available                                 | Data Not Available                                             | Data Not Available                                          | Present                                         | Data Not Available                      | Present (in androgenic development)                                                                                                          | Observations by light microscopy in induced androgenic development                                                                                                                   | 61                              |
|                  |               | <i>Rana pipiens</i>                | Present                                                    | Data Not Available                                 | Present                                                        | Data Not Available                                          | Present                                         | Data Not Available                      | Data Not Available                                                                                                                           | Light microscopy observations at low temperature                                                                                                                                     | 62                              |
|                  |               | <i>Rana nigromaculata</i>          | Present                                                    | Data Not Available                                 | Present                                                        | Data Not Available                                          | Present                                         | Present                                 | Data Not Available                                                                                                                           | Whole egg and cytological sections observations by light microscopy in centrifuged embryos and activated egg with frog's blood                                                       | 63                              |
|                  |               | <i>Bufo arenarum</i>               | Present                                                    | Present                                            | Present                                                        | Data Not Available                                          | Present                                         | Present                                 | Data Not Available                                                                                                                           | Injections of centriole preparation and cytological examination by light microscopy                                                                                                  | 65                              |
|                  |               | <i>Bufo viridis</i>                | Present                                                    | Data Not Available                                 | Data Not Available                                             | Data Not Available                                          | Present                                         | Data Not Available                      | Data Not Available                                                                                                                           | Cytological examination by light microscopy                                                                                                                                          | 64                              |
|                  |               | Xenopus                            | Present                                                    | Present                                            | Present                                                        | Data Not Available                                          | Present                                         | Present                                 | Data Not Available                                                                                                                           | MET, light microscopy observations in normal eggs and eggs treated with several drugs. Injections of mature centriole preparation                                                    | 11, 12, 28, 46, 103             |
|                  | Fishes        | Zebrafish                          | Present                                                    | Data Not Available                                 | Data Not Available                                             | Data Not Available                                          | Present                                         | Data Not Available                      | Data Not Available                                                                                                                           | Immunofluorescence against tyrosinated alfa-tubulin                                                                                                                                  | M. Salinas-Saavedra observation |
|                  | Mammals       | Mouse                              | Present (astral foci from centriolar precursors, see text) | Present (Precursor)                                | Present                                                        | Present                                                     | Present                                         | Present                                 | Present                                                                                                                                      | Embryological description by immunofluorescence, light microscopy, and MET in normal, treated with several drugs, hypertonic and low temperature conditions                          | 19, 22, 40, 41, 47, 66-69, 76   |
|                  |               | Human                              | Present                                                    | Data Not Available                                 | Data Not Available                                             | Data Not Available                                          | Present                                         | Data Not Available                      | Data Not Available                                                                                                                           | Immunofluorescence of parthenogenetic eggs treated with taxol                                                                                                                        | 70                              |
|                  |               | Pig                                | Present                                                    | Data Not Available                                 | Present                                                        | Present                                                     | Present                                         | Present                                 | Present (in artificial parthenogenesis)                                                                                                      | Immunofluorescence and Immunohistochemistry of normal and parthenogenetic embryos treated with several drugs. Electric activation                                                    | 43, 71                          |
|                  |               | Rabbit                             | Present (astral foci from centriolar precursors, see text) | Present (Precursor)                                | Present                                                        | Associated to a smooth membrane vesicles (nuclear or Golgi) | Present                                         | Present                                 | Present (in artificial parthenogenesis)                                                                                                      | Embryologic and cytological observations by light microscopy and MET                                                                                                                 | 42                              |
|                  |               | <i>Monodelphis domestica</i>       | Present                                                    | Data Not Available                                 | Data Not Available                                             | Data Not Available                                          | Present                                         | Data Not Available                      | Data Not Available                                                                                                                           | Immunocytochemical observation during oogenesis; Treated and non-treated with taxol                                                                                                  | 72                              |
|                  |               | <i>Sminthopsis macroura</i>        | Present                                                    | Data Not Available                                 | Data Not Available                                             | Data Not Available                                          | Present                                         | Data Not Available                      | Data Not Available                                                                                                                           | Immunocytochemical observation during oogenesis; Treated and non-treated with taxol                                                                                                  | 73                              |
